# Supplementary material for: Polymorphisms of Homologous RecombinationRAD51,RAD51B,XRCC2, andXRCC3Genes and the Risk of Prostate Cancer
Source: Hindawi journal article supplement (doi:10.1155/2015/828646), 2015-01-01
Supplement: f1 [file 828646.f1.pdf]

## Supplementary Materials

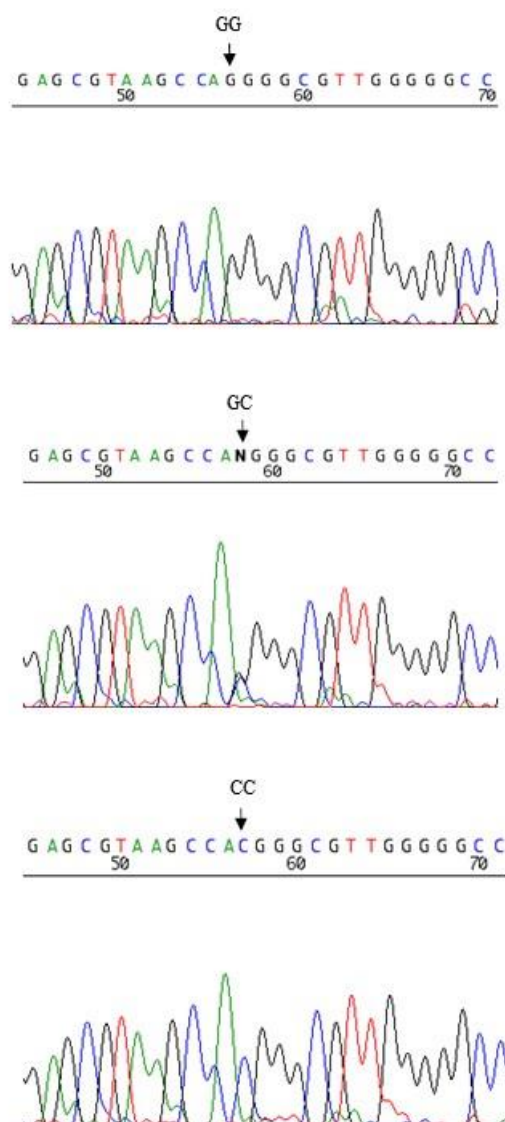

FIGURE 2: Sequencing of PCR products for rs1801320 polymorphism in *RAD51* gene. PCR products of each genotype were sequenced using BigDye Terminator Cycle Sequencing Ready Reaction Kits ver. 1.1 in ABI PRISM 377™ DNA Sequencer (Applied Biosystems)
